# Supplementary material
Source: HighWire-hosted journal article supplement (https://www.cmajopen.ca/highwire/filestream/80897/field_highwire_adjunct_files/2/open-2014-0006-03-at.pdf)
Supplement: open-2014-0006-03-at.pdf [file open-2014-0006-03-at.pdf]

**Appendix 3 (as supplied by the authors): Sensitivity and specificity for case definitions 1–4,\* by subgroups of sex, age and ethnicity (First Nations v. non–First Nations) over 5 years (2004–2008)**

**Appendix 3A: Sensitivity and specificity by sex**

| gender | med_dialysis | mrp_dialysis | COUNT | PERCENT | Category    | rate  | L_normal | U_normal | Definition* |
|--------|--------------|--------------|-------|---------|-------------|-------|----------|----------|-------------|
| F      | No           | No           | 3691  | 71.82   | Sensitivity | 87.25 | 85.30    | 89.19    | 1           |
|        | No           | Yes          | 144   | 2.8     | Specificity | 92.04 | 91.21    | 92.88    |             |
|        | Yes          | No           | 319   | 6.21    | PPV         | 75.54 | 73.20    | 77.87    |             |
|        | Yes          | Yes          | 985   | 19.17   | NPV         | 96.25 | 95.64    | 96.85    |             |
|        |              |              |       |         | Accuracy    | 90.99 | 90.08    | 91.90    |             |
|        |              |              |       |         | Kappa       | 0.75  | 0.73     | 0.77     |             |
| M      | No           | Yes          | 159   | 2.72    | Sensitivity | 87.98 | 86.23    | 89.73    | 1           |
|        | Yes          | No           | 420   | 7.19    | Specificity | 90.70 | 89.85    | 91.54    |             |
|        | Yes          | Yes          | 1164  | 19.94   | PPV         | 73.48 | 71.31    | 75.66    |             |
|        | No           | No           | 4095  | 70.14   | NPV         | 96.26 | 95.69    | 96.83    |             |
|        |              |              |       |         | Accuracy    | 90.08 | 89.18    | 90.98    |             |
|        |              |              |       |         | Kappa       | 0.74  | 0.72     | 0.76     |             |
| F      | No           | No           | 3766  | 73.28   | Sensitivity | 85.47 | 83.42    | 87.53    | 2           |
|        | No           | Yes          | 164   | 3.19    | Specificity | 93.92 | 93.18    | 94.66    |             |
|        | Yes          | No           | 244   | 4.75    | PPV         | 79.82 | 77.56    | 82.08    |             |
|        | Yes          | Yes          | 965   | 18.78   | NPV         | 95.83 | 95.20    | 96.45    |             |
|        |              |              |       |         | Accuracy    | 92.06 | 91.22    | 92.91    |             |
|        |              |              |       |         | Kappa       | 0.77  | 0.75     | 0.80     |             |
| M      | No           | No           | 4195  | 71.86   | Sensitivity | 86.55 | 84.71    | 88.38    | 2           |
|        | No           | Yes          | 178   | 3.05    | Specificity | 92.91 | 92.16    | 93.66    |             |
|        | Yes          | No           | 320   | 5.48    | PPV         | 78.16 | 76.04    | 80.27    |             |
|        | Yes          | Yes          | 1145  | 19.61   | NPV         | 95.93 | 95.34    | 96.52    |             |
|        |              |              |       |         | Accuracy    | 91.47 | 90.64    | 92.30    |             |
|        |              |              |       |         | Kappa       | 0.77  | 0.75     | 0.79     |             |
| F      | No           | No           | 3998  | 77.8    | Sensitivity | 72.54 | 69.94    | 75.15    | 3           |
|        | No           | Yes          | 310   | 6.03    | Specificity | 99.70 | 99.53    | 99.87    |             |
|        | Yes          | No           | 12    | 0.23    | PPV         | 98.56 | 97.74    | 99.37    |             |
|        | Yes          | Yes          | 819   | 15.94   | NPV         | 92.80 | 92.03    | 93.58    |             |
|        |              |              |       |         | Accuracy    | 93.73 | 93.01    | 94.46    |             |
|        |              |              |       |         | Kappa       | 0.80  | 0.78     | 0.82     |             |
| M      | No           | No           | 4497  | 77.03   | Sensitivity | 71.58 | 69.15    | 74.01    | 3           |
|        | No           | Yes          | 376   | 6.44    | Specificity | 99.60 | 99.42    | 99.79    |             |
|        | Yes          | No           | 18    | 0.31    | PPV         | 98.13 | 97.28    | 98.99    |             |
|        | Yes          | Yes          | 947   | 16.22   | NPV         | 92.28 | 91.53    | 93.03    |             |
|        |              |              |       |         | Accuracy    | 93.25 | 92.55    | 93.96    |             |
|        |              |              |       |         | Kappa       | 0.79  | 0.77     | 0.81     |             |
| F      | No           | No           | 4002  | 77.88   | Sensitivity | 46.77 | 43.86    | 49.68    | 4           |
|        | No           | Yes          | 601   | 11.69   | Specificity | 99.80 | 99.66    | 99.94    |             |
|        | Yes          | No           | 8     | 0.16    | PPV         | 98.51 | 97.48    | 99.53    |             |
|        | Yes          | Yes          | 528   | 10.27   | NPV         | 86.94 | 85.97    | 87.92    |             |
|        |              |              |       |         | Accuracy    | 88.15 | 87.22    | 89.08    |             |
|        |              |              |       |         | Kappa       | 0.57  | 0.54     | 0.60     |             |
| M      | No           | No           | 4503  | 77.13   | Sensitivity | 48.30 | 45.61    | 50.99    | 4           |
|        | No           | Yes          | 684   | 11.72   | Specificity | 99.73 | 99.58    | 99.88    |             |
|        | Yes          | No           | 12    | 0.21    | PPV         | 98.16 | 97.12    | 99.19    |             |
|        | Yes          | Yes          | 639   | 10.95   | NPV         | 86.81 | 85.89    | 87.73    |             |
|        |              |              |       |         | Accuracy    | 88.08 | 87.20    | 88.96    |             |
|        |              |              |       |         | Kappa       | 0.59  | 0.56     | 0.61     |             |

\*Case definitions: 1 = Any ONE outpatient dialysis claim; 2 = Any TWO outpatient dialysis claims; 3 = Any TWO outpatient dialysis claims >90 days apart; 4= Any TWO outpatient dialysis claims >90 days apart (no gaps >21 days).

**Appendix 3B: Sensitivity and specificity by age subgroups**

| Age Groups | med_dialysis | mrp_dialysis | COUNT | PERCENT | Category    | Rate  | L_normal | U_normal | Defintion* |
|------------|--------------|--------------|-------|---------|-------------|-------|----------|----------|------------|
| <=24       | No           | No           | 314   | 74.94   | Sensitivity | 84.51 | 76.09    | 92.92    | 1          |
|            | No           | Yes          | 11    | 2.63    | Specificity | 90.23 | 87.11    | 93.35    |            |
|            | Yes          | No           | 34    | 8.11    | PPV         | 63.83 | 54.12    | 73.54    |            |
|            | Yes          | Yes          | 60    | 14.32   | NPV         | 96.62 | 94.65    | 98.58    |            |
|            |              |              |       |         | Accuracy    | 89.26 | 85.89    | 92.63    |            |
|            |              |              |       |         | Kappa       | 0.66  | 0.57     | 0.75     |            |
| 25-29      | No           | No           | 199   | 71.07   | Sensitivity | 80.65 | 70.81    | 90.48    | 1          |
|            | No           | Yes          | 12    | 4.29    | Specificity | 91.28 | 87.54    | 95.03    |            |
|            | Yes          | No           | 19    | 6.79    | PPV         | 72.46 | 61.92    | 83.00    |            |
|            | Yes          | Yes          | 50    | 17.86   | NPV         | 94.31 | 91.19    | 97.44    |            |
|            |              |              |       |         | Accuracy    | 88.93 | 84.69    | 93.16    |            |
|            |              |              |       |         | Kappa       | 0.69  | 0.59     | 0.79     |            |
| 30-34      | No           | No           | 288   | 71.29   | Sensitivity | 92.47 | 87.11    | 97.84    | 1          |
|            | No           | Yes          | 7     | 1.73    | Specificity | 92.60 | 89.70    | 95.51    |            |
|            | Yes          | No           | 23    | 5.69    | PPV         | 78.90 | 71.24    | 86.56    |            |
|            | Yes          | Yes          | 86    | 21.29   | NPV         | 97.63 | 95.89    | 99.36    |            |
|            |              |              |       |         | Accuracy    | 92.57 | 89.58    | 95.57    |            |
|            |              |              |       |         | Kappa       | 0.80  | 0.74     | 0.87     |            |
| 35-39      | No           | No           | 339   | 69.18   | Sensitivity | 87.70 | 81.88    | 93.53    | 1          |
|            | No           | Yes          | 15    | 3.06    | Specificity | 92.12 | 89.37    | 94.87    |            |
|            | Yes          | No           | 29    | 5.92    | PPV         | 78.68 | 71.79    | 85.56    |            |
|            | Yes          | Yes          | 107   | 21.84   | NPV         | 95.76 | 93.66    | 97.86    |            |
|            |              |              |       |         | Accuracy    | 91.02 | 88.04    | 94.00    |            |
|            |              |              |       |         | Kappa       | 0.77  | 0.70     | 0.83     |            |
| 40-44      | No           | No           | 509   | 72.3    | Sensitivity | 87.90 | 82.80    | 93.00    | 1          |
|            | No           | Yes          | 19    | 2.7     | Specificity | 93.05 | 90.92    | 95.18    |            |
|            | Yes          | No           | 38    | 5.4     | PPV         | 78.41 | 72.33    | 84.49    |            |
|            | Yes          | Yes          | 138   | 19.6    | NPV         | 96.40 | 94.81    | 97.99    |            |
|            |              |              |       |         | Accuracy    | 91.90 | 89.58    | 94.23    |            |
|            |              |              |       |         | Kappa       | 0.78  | 0.72     | 0.83     |            |
| 45-49      | No           | No           | 555   | 68.69   | Sensitivity | 86.22 | 81.40    | 91.05    | 1          |
|            | No           | Yes          | 27    | 3.34    | Specificity | 90.69 | 88.38    | 92.99    |            |
|            | Yes          | No           | 57    | 7.05    | PPV         | 74.78 | 69.12    | 80.44    |            |
|            | Yes          | Yes          | 169   | 20.92   | NPV         | 95.36 | 93.65    | 97.07    |            |
|            |              |              |       |         | Accuracy    | 89.60 | 87.12    | 92.08    |            |
|            |              |              |       |         | Kappa       | 0.73  | 0.68     | 0.78     |            |
| 50-54      | No           | No           | 681   | 68.93   | Sensitivity | 88.70 | 84.69    | 92.72    | 1          |
|            | No           | Yes          | 27    | 2.73    | Specificity | 90.92 | 88.86    | 92.98    |            |
|            | Yes          | No           | 68    | 6.88    | PPV         | 75.71 | 70.69    | 80.74    |            |
|            | Yes          | Yes          | 212   | 21.46   | NPV         | 96.19 | 94.78    | 97.60    |            |
|            |              |              |       |         | Accuracy    | 90.38 | 88.21    | 92.56    |            |
|            |              |              |       |         | Kappa       | 0.75  | 0.71     | 0.80     |            |
| 55-59      | No           | No           | 791   | 65.21   | Sensitivity | 85.46 | 81.70    | 89.22    | 1          |
|            | No           | Yes          | 49    | 4.04    | Specificity | 90.30 | 88.34    | 92.26    |            |
|            | Yes          | No           | 85    | 7.01    | PPV         | 77.21 | 72.95    | 81.47    |            |
|            | Yes          | Yes          | 288   | 23.74   | NPV         | 94.17 | 92.58    | 95.75    |            |
|            |              |              |       |         | Accuracy    | 88.95 | 86.83    | 91.07    |            |
|            |              |              |       |         | Kappa       | 0.73  | 0.69     | 0.78     |            |
| 60-64      | No           | No           | 735   | 68.76   | Sensitivity | 88.93 | 85.13    | 92.73    | 1          |
|            | No           | Yes          | 29    | 2.71    | Specificity | 91.08 | 89.11    | 93.04    |            |
|            | Yes          | No           | 72    | 6.74    | PPV         | 76.39 | 71.63    | 81.16    |            |
|            | Yes          | Yes          | 233   | 21.8    | NPV         | 96.20 | 94.85    | 97.56    |            |
|            |              |              |       |         | Accuracy    | 90.55 | 88.48    | 92.63    |            |
|            |              |              |       |         | Kappa       | 0.76  | 0.71     | 0.80     |            |
| 65+        | No           | No           | 3375  | 73.34   | Sensitivity | 88.28 | 86.19    | 90.37    | 1          |
|            | No           | Yes          | 107   | 2.33    | Specificity | 91.49 | 90.59    | 92.39    |            |
|            | Yes          | No           | 314   | 6.82    | PPV         | 71.96 | 69.33    | 74.59    |            |
|            | Yes          | Yes          | 806   | 17.51   | NPV         | 96.93 | 96.35    | 97.50    |            |
|            |              |              |       |         | Accuracy    | 90.85 | 89.89    | 91.81    |            |
|            |              |              |       |         | Kappa       | 0.74  | 0.71     | 0.76     |            |

\*Case definitions: 1 = Any ONE outpatient dialysis claim; 2 = Any TWO outpatient dialysis claims; 3 = Any TWO outpatient dialysis claims >90 days apart; 4= Any TWO outpatient dialysis claims >90 days apart (no gaps >21 days).

**Appendix 3B: Sensitivity and specificity by age subgroups (continued)**

|       |     |     |      |       |             |       |       |       |   |
|-------|-----|-----|------|-------|-------------|-------|-------|-------|---|
| <=24  | No  | No  | 328  | 78.28 | Sensitivity | 83.10 | 74.38 | 91.82 | 2 |
|       | No  | Yes | 12   | 2.86  | Specificity | 94.25 | 91.81 | 96.70 |   |
|       | Yes | No  | 20   | 4.77  | PPV         | 74.68 | 65.10 | 84.27 |   |
|       | Yes | Yes | 59   | 14.08 | NPV         | 96.47 | 94.51 | 98.43 |   |
|       |     |     |      |       | Accuracy    | 92.36 | 89.54 | 95.19 |   |
| 25-29 | No  | No  | 206  | 73.57 | Sensitivity | 80.65 | 70.81 | 90.48 | 2 |
|       | No  | Yes | 12   | 4.29  | Specificity | 94.50 | 91.47 | 97.52 |   |
|       | Yes | No  | 12   | 4.29  | PPV         | 80.65 | 70.81 | 90.48 |   |
|       | Yes | Yes | 50   | 17.86 | NPV         | 94.50 | 91.47 | 97.52 |   |
|       |     |     |      |       | Accuracy    | 91.43 | 87.71 | 95.14 |   |
| 30-34 | No  | No  | 293  | 72.52 | Sensitivity | 91.40 | 85.70 | 97.10 | 2 |
|       | No  | Yes | 8    | 1.98  | Specificity | 94.21 | 91.62 | 96.81 |   |
|       | Yes | No  | 18   | 4.46  | PPV         | 82.52 | 75.19 | 89.86 |   |
|       | Yes | Yes | 85   | 21.04 | NPV         | 97.34 | 95.53 | 99.16 |   |
|       |     |     |      |       | Accuracy    | 93.56 | 90.79 | 96.34 |   |
| 35-39 | No  | No  | 346  | 70.61 | Sensitivity | 84.43 | 77.99 | 90.86 | 2 |
|       | No  | Yes | 19   | 3.88  | Specificity | 94.02 | 91.60 | 96.44 |   |
|       | Yes | No  | 22   | 4.49  | PPV         | 82.40 | 75.72 | 89.08 |   |
|       | Yes | Yes | 103  | 21.02 | NPV         | 94.79 | 92.52 | 97.07 |   |
|       |     |     |      |       | Accuracy    | 91.63 | 88.79 | 94.47 |   |
| 40-44 | No  | No  | 520  | 73.86 | Sensitivity | 87.26 | 82.05 | 92.48 | 2 |
|       | No  | Yes | 20   | 2.84  | Specificity | 95.06 | 93.25 | 96.88 |   |
|       | Yes | No  | 27   | 3.84  | PPV         | 83.54 | 77.86 | 89.21 |   |
|       | Yes | Yes | 137  | 19.46 | NPV         | 96.30 | 94.70 | 97.89 |   |
|       |     |     |      |       | Accuracy    | 93.32 | 91.22 | 95.43 |   |
| 45-49 | No  | No  | 574  | 71.04 | Sensitivity | 83.67 | 78.50 | 88.85 | 2 |
|       | No  | Yes | 32   | 3.96  | Specificity | 93.79 | 91.88 | 95.70 |   |
|       | Yes | No  | 38   | 4.7   | PPV         | 81.19 | 75.80 | 86.58 |   |
|       | Yes | Yes | 164  | 20.3  | NPV         | 94.72 | 92.94 | 96.50 |   |
|       |     |     |      |       | Accuracy    | 91.34 | 89.10 | 93.58 |   |
| 50-54 | No  | No  | 697  | 70.55 | Sensitivity | 88.28 | 84.21 | 92.36 | 2 |
|       | No  | Yes | 28   | 2.83  | Specificity | 93.06 | 91.24 | 94.88 |   |
|       | Yes | No  | 52   | 5.26  | PPV         | 80.23 | 75.41 | 85.04 |   |
|       | Yes | Yes | 211  | 21.36 | NPV         | 96.14 | 94.74 | 97.54 |   |
|       |     |     |      |       | Accuracy    | 91.90 | 89.92 | 93.89 |   |
| 55-59 | No  | No  | 813  | 67.02 | Sensitivity | 83.38 | 79.41 | 87.36 | 2 |
|       | No  | Yes | 56   | 4.62  | Specificity | 92.81 | 91.10 | 94.52 |   |
|       | Yes | No  | 63   | 5.19  | PPV         | 81.69 | 77.60 | 85.77 |   |
|       | Yes | Yes | 281  | 23.17 | NPV         | 93.56 | 91.92 | 95.19 |   |
|       |     |     |      |       | Accuracy    | 90.19 | 88.21 | 92.17 |   |
| 60-64 | No  | No  | 748  | 69.97 | Sensitivity | 87.40 | 83.39 | 91.42 | 2 |
|       | No  | Yes | 33   | 3.09  | Specificity | 92.69 | 90.89 | 94.49 |   |
|       | Yes | No  | 59   | 5.52  | PPV         | 79.51 | 74.85 | 84.18 |   |
|       | Yes | Yes | 229  | 21.42 | NPV         | 95.77 | 94.36 | 97.19 |   |
|       |     |     |      |       | Accuracy    | 91.39 | 89.43 | 93.36 |   |
| 65+   | No  | No  | 3436 | 74.66 | Sensitivity | 86.64 | 84.43 | 88.84 | 2 |
|       | No  | Yes | 122  | 2.65  | Specificity | 93.14 | 92.33 | 93.96 |   |
|       | Yes | No  | 253  | 5.5   | PPV         | 75.77 | 73.17 | 78.37 |   |
|       | Yes | Yes | 791  | 17.19 | NPV         | 96.57 | 95.97 | 97.17 |   |
|       |     |     |      |       | Accuracy    | 91.85 | 90.95 | 92.75 |   |
|       |     |     |      | Kappa | 0.76        | 0.73  | 0.78  |       |   |

\*Case definitions: 1 = Any ONE outpatient dialysis claim; 2 = Any TWO outpatient dialysis claims; 3 = Any TWO outpatient dialysis claims >90 days apart; 4= Any TWO outpatient dialysis claims >90 days apart (no gaps >21 days).

**Appendix 3B: Sensitivity and specificity by age subgroups (continued)**

|       |     |     |      |       |             |       |       |        |   |
|-------|-----|-----|------|-------|-------------|-------|-------|--------|---|
| <=24  | No  | No  | 340  | 84.16 | Sensitivity | 66.13 | 54.35 | 77.91  | 3 |
|       | No  | Yes | 21   | 5.2   | Specificity | 99.42 | 98.61 | 100.22 |   |
|       | Yes | No  | 2    | 0.5   | PPV         | 95.35 | 89.05 | 101.64 |   |
|       | Yes | Yes | 41   | 10.15 | NPV         | 94.18 | 91.77 | 96.60  |   |
|       |     |     |      |       | Accuracy    | 94.31 | 91.92 | 96.70  |   |
|       |     |     |      |       | Kappa       | 0.75  | 0.65  | 0.85   |   |
| 25-29 | No  | No  | 215  | 78.18 | Sensitivity | 67.80 | 55.87 | 79.72  | 3 |
|       | No  | Yes | 19   | 6.91  | Specificity | 99.54 | 98.63 | 100.44 |   |
|       | Yes | No  | 1    | 0.36  | PPV         | 97.56 | 92.84 | 102.28 |   |
|       | Yes | Yes | 40   | 14.55 | NPV         | 91.88 | 88.38 | 95.38  |   |
|       |     |     |      |       | Accuracy    | 92.73 | 89.40 | 96.05  |   |
|       |     |     |      |       | Kappa       | 0.76  | 0.66  | 0.86   |   |
| 30-34 | No  | No  | 310  | 78.68 | Sensitivity | 78.31 | 69.45 | 87.18  | 3 |
|       | No  | Yes | 18   | 4.57  | Specificity | 99.68 | 99.05 | 100.31 |   |
|       | Yes | No  | 1    | 0.25  | PPV         | 98.48 | 95.54 | 101.43 |   |
|       | Yes | Yes | 65   | 16.5  | NPV         | 94.51 | 92.05 | 96.98  |   |
|       |     |     |      |       | Accuracy    | 95.18 | 92.86 | 97.50  |   |
|       |     |     |      |       | Kappa       | 0.84  | 0.78  | 0.91   |   |
| 35-39 | No  | No  | 362  | 76.21 | Sensitivity | 78.38 | 70.72 | 86.04  | 3 |
|       | No  | Yes | 24   | 5.05  | Specificity | 99.45 | 98.69 | 100.21 |   |
|       | Yes | No  | 2    | 0.42  | PPV         | 97.75 | 94.67 | 100.83 |   |
|       | Yes | Yes | 87   | 18.32 | NPV         | 93.78 | 91.37 | 96.19  |   |
|       |     |     |      |       | Accuracy    | 94.53 | 92.26 | 96.80  |   |
|       |     |     |      |       | Kappa       | 0.84  | 0.78  | 0.90   |   |
| 40-44 | No  | No  | 541  | 77.4  | Sensitivity | 70.70 | 63.58 | 77.82  | 3 |
|       | No  | Yes | 46   | 6.58  | Specificity | 99.82 | 99.45 | 100.18 |   |
|       | Yes | No  | 1    | 0.14  | PPV         | 99.11 | 97.37 | 100.85 |   |
|       | Yes | Yes | 111  | 15.88 | NPV         | 92.16 | 89.99 | 94.34  |   |
|       |     |     |      |       | Accuracy    | 93.28 | 91.25 | 95.30  |   |
|       |     |     |      |       | Kappa       | 0.79  | 0.73  | 0.84   |   |
| 45-49 | No  | No  | 600  | 75.38 | Sensitivity | 72.77 | 66.46 | 79.09  | 3 |
|       | No  | Yes | 52   | 6.53  | Specificity | 99.17 | 98.45 | 99.89  |   |
|       | Yes | No  | 5    | 0.63  | PPV         | 96.53 | 93.54 | 99.52  |   |
|       | Yes | Yes | 139  | 17.46 | NPV         | 92.02 | 89.95 | 94.10  |   |
|       |     |     |      |       | Accuracy    | 92.84 | 90.86 | 94.82  |   |
|       |     |     |      |       | Kappa       | 0.79  | 0.73  | 0.84   |   |
| 50-54 | No  | No  | 743  | 76.68 | Sensitivity | 75.78 | 70.16 | 81.41  | 3 |
|       | No  | Yes | 54   | 5.57  | Specificity | 99.60 | 99.14 | 100.05 |   |
|       | Yes | No  | 3    | 0.31  | PPV         | 98.26 | 96.30 | 100.21 |   |
|       | Yes | Yes | 169  | 17.44 | NPV         | 93.22 | 91.48 | 94.97  |   |
|       |     |     |      |       | Accuracy    | 94.12 | 92.48 | 95.75  |   |
|       |     |     |      |       | Kappa       | 0.82  | 0.77  | 0.86   |   |
| 55-59 | No  | No  | 857  | 72.57 | Sensitivity | 73.67 | 68.83 | 78.50  | 3 |
|       | No  | Yes | 84   | 7.11  | Specificity | 99.42 | 98.91 | 99.93  |   |
|       | Yes | No  | 5    | 0.42  | PPV         | 97.92 | 96.11 | 99.72  |   |
|       | Yes | Yes | 235  | 19.9  | NPV         | 91.07 | 89.25 | 92.90  |   |
|       |     |     |      |       | Accuracy    | 92.46 | 90.78 | 94.15  |   |
|       |     |     |      |       | Kappa       | 0.79  | 0.75  | 0.83   |   |
| 60-64 | No  | No  | 814  | 73.87 | Sensitivity | 78.40 | 73.64 | 83.16  | 3 |
|       | No  | Yes | 62   | 5.63  | Specificity | 99.88 | 99.64 | 100.12 |   |
|       | Yes | No  | 1    | 0.09  | PPV         | 99.56 | 98.69 | 100.42 |   |
|       | Yes | Yes | 225  | 20.42 | NPV         | 92.92 | 91.22 | 94.62  |   |
|       |     |     |      |       | Accuracy    | 94.28 | 92.75 | 95.82  |   |
|       |     |     |      |       | Kappa       | 0.84  | 0.80  | 0.88   |   |
| 65+   | No  | No  | 3713 | 79.3  | Sensitivity | 68.13 | 65.18 | 71.07  | 3 |
|       | No  | Yes | 306  | 6.54  | Specificity | 99.76 | 99.60 | 99.92  |   |
|       | Yes | No  | 9    | 0.19  | PPV         | 98.64 | 97.76 | 99.52  |   |
|       | Yes | Yes | 654  | 13.97 | NPV         | 92.39 | 91.57 | 93.21  |   |
|       |     |     |      |       | Accuracy    | 93.27 | 92.50 | 94.05  |   |
|       |     |     |      |       | Kappa       | 0.77  | 0.74  | 0.79   |   |

\*Case definitions: 1 = Any ONE outpatient dialysis claim; 2 = Any TWO outpatient dialysis claims; 3 = Any TWO outpatient dialysis claims >90 days apart; 4= Any TWO outpatient dialysis claims >90 days apart (no gaps >21 days).

**Appendix 3B: Sensitivity and specificity by age subgroups (continued)**

|       |     |     |      |       |             |        |        |        |   |
|-------|-----|-----|------|-------|-------------|--------|--------|--------|---|
| <=24  | No  | No  | 341  | 84.41 | Sensitivity | 37.10  | 25.07  | 49.12  | 4 |
|       | No  | Yes | 39   | 9.65  | Specificity | 99.71  | 99.14  | 100.28 |   |
|       | Yes | No  | 1    | 0.25  | PPV         | 95.83  | 87.84  | 103.83 |   |
|       | Yes | Yes | 23   | 5.69  | NPV         | 89.74  | 86.69  | 92.79  |   |
|       |     |     |      |       | Accuracy    | 90.10  | 87.10  | 93.10  |   |
|       |     |     |      | Kappa | 0.49        | 0.36   | 0.62   |        |   |
| 25-29 | No  | No  | 215  | 78.18 | Sensitivity | 44.07  | 31.40  | 56.74  | 4 |
|       | No  | Yes | 33   | 12    | Specificity | 99.54  | 98.63  | 100.44 |   |
|       | Yes | No  | 1    | 0.36  | PPV         | 96.30  | 89.17  | 103.42 |   |
|       | Yes | Yes | 26   | 9.45  | NPV         | 86.69  | 82.47  | 90.92  |   |
|       |     |     |      |       | Accuracy    | 87.64  | 83.54  | 91.73  |   |
|       |     |     |      | Kappa | 0.54        | 0.41   | 0.67   |        |   |
| 30-34 | No  | No  | 310  | 78.68 | Sensitivity | 51.81  | 41.06  | 62.56  | 4 |
|       | No  | Yes | 40   | 10.15 | Specificity | 99.68  | 99.05  | 100.31 |   |
|       | Yes | No  | 1    | 0.25  | PPV         | 97.73  | 93.32  | 102.13 |   |
|       | Yes | Yes | 43   | 10.91 | NPV         | 88.57  | 85.24  | 91.90  |   |
|       |     |     |      |       | Accuracy    | 89.59  | 86.40  | 92.79  |   |
|       |     |     |      | Kappa | 0.62        | 0.52   | 0.72   |        |   |
| 35-39 | No  | No  | 363  | 76.42 | Sensitivity | 49.55  | 40.25  | 58.85  | 4 |
|       | No  | Yes | 56   | 11.79 | Specificity | 99.73  | 99.19  | 100.26 |   |
|       | Yes | No  | 1    | 0.21  | PPV         | 98.21  | 94.75  | 101.68 |   |
|       | Yes | Yes | 55   | 11.58 | NPV         | 86.63  | 83.38  | 89.89  |   |
|       |     |     |      |       | Accuracy    | 88.00  | 84.89  | 91.11  |   |
|       |     |     |      | Kappa | 0.60        | 0.50   | 0.69   |        |   |
| 40-44 | No  | No  | 541  | 77.4  | Sensitivity | 45.86  | 38.07  | 53.65  | 4 |
|       | No  | Yes | 85   | 12.16 | Specificity | 99.82  | 99.45  | 100.18 |   |
|       | Yes | No  | 1    | 0.14  | PPV         | 98.63  | 95.96  | 101.30 |   |
|       | Yes | Yes | 72   | 10.3  | NPV         | 86.42  | 83.74  | 89.11  |   |
|       |     |     |      |       | Accuracy    | 87.70  | 85.12  | 90.27  |   |
|       |     |     |      | Kappa | 0.56        | 0.49   | 0.64   |        |   |
| 45-49 | No  | No  | 602  | 75.63 | Sensitivity | 45.55  | 38.49  | 52.61  | 4 |
|       | No  | Yes | 104  | 13.07 | Specificity | 99.50  | 98.94  | 100.06 |   |
|       | Yes | No  | 3    | 0.38  | PPV         | 96.67  | 92.96  | 100.38 |   |
|       | Yes | Yes | 87   | 10.93 | NPV         | 85.27  | 82.65  | 87.88  |   |
|       |     |     |      |       | Accuracy    | 86.56  | 84.04  | 89.07  |   |
|       |     |     |      | Kappa | 0.55        | 0.48   | 0.62   |        |   |
| 50-54 | No  | No  | 743  | 76.68 | Sensitivity | 47.98  | 41.42  | 54.54  | 4 |
|       | No  | Yes | 116  | 11.97 | Specificity | 99.60  | 99.14  | 100.05 |   |
|       | Yes | No  | 3    | 0.31  | PPV         | 97.27  | 94.23  | 100.32 |   |
|       | Yes | Yes | 107  | 11.04 | NPV         | 86.50  | 84.21  | 88.78  |   |
|       |     |     |      |       | Accuracy    | 87.72  | 85.52  | 89.91  |   |
|       |     |     |      | Kappa | 0.58        | 0.51   | 0.64   |        |   |
| 55-59 | No  | No  | 858  | 72.65 | Sensitivity | 45.14  | 39.68  | 50.60  | 4 |
|       | No  | Yes | 175  | 14.82 | Specificity | 99.54  | 99.08  | 99.99  |   |
|       | Yes | No  | 4    | 0.34  | PPV         | 97.30  | 94.68  | 99.91  |   |
|       | Yes | Yes | 144  | 12.19 | NPV         | 83.06  | 80.77  | 85.35  |   |
|       |     |     |      |       | Accuracy    | 84.84  | 82.66  | 87.03  |   |
|       |     |     |      | Kappa | 0.54        | 0.48   | 0.59   |        |   |
| 60-64 | No  | No  | 815  | 73.96 | Sensitivity | 48.08  | 42.30  | 53.86  | 4 |
|       | No  | Yes | 149  | 13.52 | Specificity | 100.00 | 100.00 | 100.00 |   |
|       | Yes | No  | 0    | 0     | PPV         | 100.00 | 100.00 | 100.00 |   |
|       | Yes | Yes | 138  | 12.52 | NPV         | 84.54  | 82.26  | 86.83  |   |
|       |     |     |      |       | Accuracy    | 86.48  | 84.32  | 88.64  |   |
|       |     |     |      | Kappa | 0.58        | 0.52   | 0.64   |        |   |
| 65+   | No  | No  | 3717 | 79.39 | Sensitivity | 49.17  | 46.00  | 52.33  | 4 |
|       | No  | Yes | 488  | 10.42 | Specificity | 99.87  | 99.75  | 99.98  |   |
|       | Yes | No  | 5    | 0.11  | PPV         | 98.95  | 98.04  | 99.87  |   |
|       | Yes | Yes | 472  | 10.08 | NPV         | 88.39  | 87.43  | 89.36  |   |
|       |     |     |      |       | Accuracy    | 89.47  | 88.54  | 90.40  |   |
|       |     |     |      | Kappa | 0.60        | 0.57   | 0.63   |        |   |

\*Case definitions: 1 = Any ONE outpatient dialysis claim; 2 = Any TWO outpatient dialysis claims; 3 = Any TWO outpatient dialysis claims >90 days apart; 4= Any TWO outpatient dialysis claims >90 days apart (no gaps >21 days).

**Appendix 3C: Sensitivity and specificity by ethnicity — First Nations (FN) status**

| FN Status | med_dialysis | mrp_dialysis | COUNT | PERCENT | Category    | Rate  | L_normal | U_normal | Defintion* |
|-----------|--------------|--------------|-------|---------|-------------|-------|----------|----------|------------|
| 0         | No           | No           | 7064  | 73.55   | Sensitivity | 87.56 | 86.07    | 89.04    | 1          |
|           | No           | Yes          | 236   | 2.46    | Specificity | 91.66 | 91.04    | 92.27    |            |
|           | Yes          | No           | 643   | 6.7     | PPV         | 72.09 | 70.26    | 73.92    |            |
|           | Yes          | Yes          | 1661  | 17.29   | NPV         | 96.77 | 96.36    | 97.17    |            |
|           |              |              |       |         | Accuracy    | 90.85 | 90.19    | 91.51    |            |
|           |              |              |       |         | Kappa       | 0.73  | 0.72     | 0.75     |            |
| 1         | No           | No           | 722   | 52.59   | Sensitivity | 87.93 | 85.22    | 90.64    | 1          |
|           | No           | Yes          | 67    | 4.88    | Specificity | 88.26 | 86.06    | 90.47    |            |
|           | Yes          | No           | 96    | 6.99    | PPV         | 83.56 | 80.56    | 86.57    |            |
|           | Yes          | Yes          | 488   | 35.54   | NPV         | 91.51 | 89.56    | 93.45    |            |
|           |              |              |       |         | Accuracy    | 88.13 | 85.87    | 90.39    |            |
|           |              |              |       |         | Kappa       | 0.76  | 0.72     | 0.79     |            |
| 0         | No           | No           | 7222  | 75.2    | Sensitivity | 85.98 | 84.42    | 87.54    | 2          |
|           | No           | Yes          | 266   | 2.77    | Specificity | 93.71 | 93.16    | 94.25    |            |
|           | Yes          | No           | 485   | 5.05    | PPV         | 77.08 | 75.29    | 78.87    |            |
|           | Yes          | Yes          | 1631  | 16.98   | NPV         | 96.45 | 96.03    | 96.87    |            |
|           |              |              |       |         | Accuracy    | 92.18 | 91.57    | 92.79    |            |
|           |              |              |       |         | Kappa       | 0.76  | 0.75     | 0.78     |            |
| 1         | No           | No           | 739   | 53.82   | Sensitivity | 86.31 | 83.45    | 89.17    | 2          |
|           | No           | Yes          | 76    | 5.54    | Specificity | 90.34 | 88.32    | 92.37    |            |
|           | Yes          | No           | 79    | 5.75    | PPV         | 85.84 | 82.95    | 88.73    |            |
|           | Yes          | Yes          | 479   | 34.89   | NPV         | 90.67 | 88.68    | 92.67    |            |
|           |              |              |       |         | Accuracy    | 88.71 | 86.54    | 90.88    |            |
|           |              |              |       |         | Kappa       | 0.77  | 0.73     | 0.80     |            |
| 0         | No           | No           | 7684  | 80.01   | Sensitivity | 70.95 | 68.91    | 73.00    | 3          |
|           | No           | Yes          | 551   | 5.74    | Specificity | 99.70 | 99.58    | 99.82    |            |
|           | Yes          | No           | 23    | 0.24    | PPV         | 98.32 | 97.64    | 99.00    |            |
|           | Yes          | Yes          | 1346  | 14.01   | NPV         | 93.31 | 92.77    | 93.85    |            |
|           |              |              |       |         | Accuracy    | 94.02 | 93.51    | 94.54    |            |
|           |              |              |       |         | Kappa       | 0.79  | 0.77     | 0.81     |            |
| 1         | No           | No           | 811   | 59.07   | Sensitivity | 75.68 | 72.11    | 79.25    | 3          |
|           | No           | Yes          | 135   | 9.83    | Specificity | 99.14 | 98.51    | 99.78    |            |
|           | Yes          | No           | 7     | 0.51    | PPV         | 98.36 | 97.16    | 99.57    |            |
|           | Yes          | Yes          | 420   | 30.59   | NPV         | 85.73 | 83.50    | 87.96    |            |
|           |              |              |       |         | Accuracy    | 89.66 | 87.72    | 91.60    |            |
|           |              |              |       |         | Kappa       | 0.78  | 0.74     | 0.81     |            |
| 0         | No           | No           | 7690  | 80.07   | Sensitivity | 51.03 | 48.78    | 53.28    | 4          |
|           | No           | Yes          | 929   | 9.67    | Specificity | 99.78 | 99.67    | 99.88    |            |
|           | Yes          | No           | 17    | 0.18    | PPV         | 98.27 | 97.46    | 99.09    |            |
|           | Yes          | Yes          | 968   | 10.08   | NPV         | 89.22 | 88.57    | 89.88    |            |
|           |              |              |       |         | Accuracy    | 90.15 | 89.52    | 90.78    |            |
|           |              |              |       |         | Kappa       | 0.62  | 0.60     | 0.64     |            |
| 1         | No           | No           | 815   | 59.36   | Sensitivity | 35.86 | 31.87    | 39.85    | 4          |
|           | No           | Yes          | 356   | 25.93   | Specificity | 99.63 | 99.22    | 100.05   |            |
|           | Yes          | No           | 3     | 0.22    | PPV         | 98.51 | 96.85    | 100.18   |            |
|           | Yes          | Yes          | 199   | 14.49   | NPV         | 69.60 | 66.96    | 72.23    |            |
|           |              |              |       |         | Accuracy    | 73.85 | 71.34    | 76.37    |            |
|           |              |              |       |         | Kappa       | 0.40  | 0.35     | 0.44     |            |

\*Case definitions: 1 = Any ONE outpatient dialysis claim; 2 = Any TWO outpatient dialysis claims; 3 = Any TWO outpatient dialysis claims >90 days apart; 4= Any TWO outpatient dialysis claims >90 days apart (no gaps >21 days).
